# Supplementary material
Source: PubMed Central journal article supplement (PMC9435982)
Supplement: CJN.01280122-SupplementaryData1.pdf [file CJN.01280122-SupplementaryData1.pdf]

## **SUPPLEMENTAL MATERIAL TABLE OF CONTENTS**

Supplemental Table 1: Clinical characteristics associated with progression from low-grade proteinuria to urine protein-creatinine ratio (UPCR)  $\geq 0.5$  g/g using case complete analyses

Supplemental Table 2: Cox proportional hazard models for the sensitivity analyses

Supplemental Table 3: Baseline comparisons between progressors and non-progressors; fast progressors and slow/non-progressors with kidney biopsy as the outcome

Supplemental Table 4: Cox proportional hazard models for progressors vs. non-progressors and fast progressors vs. slow/non-progressors with clinically indicated kidney biopsy as the outcome

Supplemental Table 5: Comparison of progressors with normal versus low complement; progressors with normal complement vs non-progressors

**SUPPLEMENTAL TABLE 1:** Clinical characteristics associated with progression from low-grade proteinuria to urine protein-creatinine ratio (UPCR)  $\geq 0.5$  g/g\*

| <b>Model 1, Outcome: progression to UPCR <math>\geq 0.5</math> g/g</b>                            |                     |                             |                |                            |                |
|---------------------------------------------------------------------------------------------------|---------------------|-----------------------------|----------------|----------------------------|----------------|
|                                                                                                   | <b>N (%) events</b> | <b>Unadjusted HR, 95%CI</b> | <b>p-value</b> | <b>Adjusted HR*, 95%CI</b> | <b>p-value</b> |
| Age at Index Date, per 1 year older                                                               | 67 (50%)            | 0.97 (0.95, 0.99)           | 0.003          | 0.99(0.97, 1.0)            | 0.36           |
| Duration of SLE at index date, per 1 year longer                                                  | 67 (50%)            | 0.94 (0.90, 0.98)           | 0.004          | 0.96(0.92, 1.0)            | 0.07           |
| Low C3 and/or C4                                                                                  | 67 (50%)            |                             | <0.001         |                            | 0.003          |
| No                                                                                                |                     | 1 (reference)               |                | 1 (reference)              |                |
| Yes                                                                                               |                     | 3.3 (1.8, 6.1)              |                | 2.7(1.4, 5.2)              |                |
| <b>Non-Imputed Model 2, Outcome: progression to UPCR <math>\geq 0.5</math> g/g within 2 years</b> |                     |                             |                |                            |                |
|                                                                                                   | <b>N (%) events</b> | <b>Unadjusted HR, 95%CI</b> | <b>p-value</b> | <b>Adjusted HR*, 95%CI</b> | <b>p-value</b> |
| Age at Index Date, per 1 year older                                                               | 42 (31%)            | 0.97 (0.95, 0.99)           | 0.02           | 0.99(0.96, 1.0)            | 0.53           |
| Duration of SLE at index date, per 1 year longer                                                  | 42 (31%)            | 0.89 (0.82, 0.95)           | 0.002          | 0.91(0.84, 0.98)           | 0.02           |
| Low C3 and/or C4                                                                                  | 42 (31%)            |                             | 0.001          |                            | 0.02           |
| No                                                                                                |                     | 1 (reference)               |                | 1 (reference)              |                |
| Yes                                                                                               |                     | 4.6 (1.8, 11.7)             |                | 3.1(1.2, 8.1)              |                |

\*Complete case analyses with N=134 participants with available data. All models were adjusted for race, sex and urine RBC>5 per HPF

**SUPPLEMENTAL TABLE 2:** Cox proportional hazard models for the sensitivity analyses\*

| <b>Model 1, Outcome: progression to UPCR <math>\geq</math> 0.5 g/g for subset of patients with medication/comorbidity data</b>                |                                |                |
|-----------------------------------------------------------------------------------------------------------------------------------------------|--------------------------------|----------------|
| N=106                                                                                                                                         |                                |                |
|                                                                                                                                               | <b>Adjusted HR*,<br/>95%CI</b> | <b>p-value</b> |
| Age at Index Date, per 1 year older                                                                                                           | 0.97(0.95, 1.0)                | 0.05           |
| Duration of SLE at index date, per 1 year longer                                                                                              | 0.92(0.87, 0.99)               | 0.22           |
| Low C3 and/or C4                                                                                                                              |                                | 0.04           |
| No                                                                                                                                            | 1 (reference)                  |                |
| Yes                                                                                                                                           | 2.2(1.1, 4.8)                  |                |
| Baseline hypertension                                                                                                                         |                                | 0.001          |
| No                                                                                                                                            | 1 (reference)                  |                |
| Yes                                                                                                                                           | 3.8(1.7, 8.3)                  |                |
| <b>Model 2, Outcome: progression to UPCR <math>\geq</math> 0.5 g/g within 2 years for subset of patients with medication/comorbidity data</b> |                                |                |
| N=106                                                                                                                                         |                                |                |
|                                                                                                                                               | <b>Adjusted HR*,<br/>95%CI</b> | <b>p-value</b> |
| Age at Index Date, per 1 year older                                                                                                           | 0.96(0.93, 1.0)                | 0.05           |
| Duration of SLE at index date, per 1 year longer                                                                                              | 0.89(0.80, 0.99)               | 0.04           |
| Low C3 and/or C4                                                                                                                              |                                | 0.05           |
| No                                                                                                                                            | 1 (reference)                  |                |
| Yes                                                                                                                                           | 0.47(1.0, 22)                  |                |
| Baseline diabetes                                                                                                                             |                                | 0.001          |
| No                                                                                                                                            | 1 (reference)                  |                |
| Yes                                                                                                                                           | 32(4.3, 241)                   |                |
| Baseline azathioprine use                                                                                                                     |                                | 0.07           |
| No                                                                                                                                            | 1 (reference)                  |                |
| Yes                                                                                                                                           | 0.26(0.06, 1.1)                |                |
| <b>Model 3, Outcome: progression to UPCR <math>\geq</math> 0.5 g/g within 2 years for fast progressors vs. non-progressors</b>                |                                |                |
| N=110                                                                                                                                         |                                |                |
|                                                                                                                                               | <b>Adjusted HR*,<br/>95%CI</b> | <b>p-value</b> |
| Age at Index Date, per 1 year older                                                                                                           | 0.99(0.96, 1.0)                | 0.53           |
| Duration of SLE at index date, per 1 year longer                                                                                              | 0.92(0.85, 0.99)               | 0.04           |
| Low C3 and/or C4                                                                                                                              |                                | 0.02           |

|                                                                                                                                                                                    |                                |                |
|------------------------------------------------------------------------------------------------------------------------------------------------------------------------------------|--------------------------------|----------------|
| No                                                                                                                                                                                 | 1 (reference)                  |                |
| Yes                                                                                                                                                                                | 3.4(1.3, 9.1)                  |                |
| <b>Model 4, Outcome: progression to UPCR <math>\geq</math>0.5 g/g within 1 years</b><br>N=134                                                                                      |                                |                |
|                                                                                                                                                                                    | <b>Adjusted HR*,<br/>95%CI</b> | <b>p-value</b> |
| Age at Index Date, per 1 year older                                                                                                                                                | 0.98(0.95, 1.0),<br>0.28       | 0.28           |
| Duration of SLE at index date, per 1 year longer                                                                                                                                   | 0.89(0.81, 0.99)               | 0.03           |
| Low C3 and/or C4                                                                                                                                                                   |                                | 0.07           |
| No                                                                                                                                                                                 | 1 (reference)                  |                |
| Yes                                                                                                                                                                                | 3.2(0.92, 11)                  |                |
| <b>Model 5, Outcome: progression to UPCR <math>\geq</math>0.5 for patients with baseline<br/>UPCR <math>\geq</math>0.25 and <math>&lt;</math>0.5</b><br>N=84 patients with outcome |                                |                |
|                                                                                                                                                                                    | <b>Adjusted HR*,<br/>95%CI</b> | <b>p-value</b> |
| Age at Index Date, per 1 year older                                                                                                                                                | 0.99(0.97, 1.0)                | 0.64           |
| Duration of SLE at index date, per 1 year longer                                                                                                                                   | 0.95(0.90, 1.0)                | 0.1            |
| Low C3 and/or C4                                                                                                                                                                   |                                | 0.03           |
| No                                                                                                                                                                                 | 1 (reference)                  |                |
| Yes                                                                                                                                                                                | 2.6(1.1, 6.1), 0.03            |                |

\* Complete case analyses were done. All models were adjusted for race, sex and urine RBC  $>$ 5 per HPF

**SUPPLEMENTAL TABLE 3:** Baseline comparisons between progressors and non-progressors; fast progressors and slow/non-progressors with kidney biopsy as the outcome\*

|                                                                         | <b>Outcome: Clinically Indicated<br/>Kidney Biopsy</b> |                            | <b>Outcome: Clinically Indicated<br/>Kidney Biopsy within 2 years<br/>from index date</b> |                                     |
|-------------------------------------------------------------------------|--------------------------------------------------------|----------------------------|-------------------------------------------------------------------------------------------|-------------------------------------|
|                                                                         | Progressors<br>(n= 44)                                 | Non-Progressors<br>(n=107) | Fast<br>Progressors<br>(n= 20)                                                            | Slow/Non-<br>Progressors<br>(n=131) |
| <b>Demographics</b>                                                     |                                                        |                            |                                                                                           |                                     |
| Age at index date, years,<br>median (IQR)                               | <b>25(20, 39)</b>                                      | <b>36(27, 48)</b>          | <b>24(20,<br/>31)</b>                                                                     | <b>35(26, 47)</b>                   |
| Men, n(%)                                                               | 5(11)                                                  | 11(10)                     | 4(20)                                                                                     | 12(9)                               |
| Black or African-American,<br>n(%)                                      | 19(43)                                                 | 40(37)                     | 8(40)                                                                                     | 51(38)                              |
| Hispanic/Latino, n(%)                                                   | 26(57)                                                 | 60(56)                     | 11(55)                                                                                    | 74(56)                              |
| SLE diagnosis to low-grade<br>proteinuria onset, years,<br>median (IQR) | <b>1(0, 6)</b>                                         | <b>5(1, 11)</b>            | <b>0.5(0, 3)</b>                                                                          | <b>4(1, 11)</b>                     |
| <b>Comorbidities**</b>                                                  |                                                        |                            |                                                                                           |                                     |
| History of hypertension,<br>n(%)                                        | 6(18)                                                  | 14(17)                     | 2(11)                                                                                     | 18(18)                              |
| History of diabetes, n(%)                                               | 3(9)                                                   | 7(8)                       | 2(11)                                                                                     | 8(8)                                |
| <b>Medications**</b>                                                    |                                                        |                            |                                                                                           |                                     |
| Hydroxychloroquine, n(%)                                                | 20(59)                                                 | 58(70)                     | 10(56)                                                                                    | 68(69)                              |
| Azathioprine, n(%)                                                      | <b>2(6)</b>                                            | <b>18(22)</b>              | 1(6)                                                                                      | 19(19)                              |

|                                                                    |               |               |               |               |
|--------------------------------------------------------------------|---------------|---------------|---------------|---------------|
| Mycophenolate Mofetil, n(%)                                        | 3(8)          | 2(2)          | 1(6)          | 4(4)          |
| Other Immunosuppressives <sup>‡</sup> , n(%)                       | 4(12)         | 6(7)          | 1(6)          | 10(10)        |
| ACEI/ARB <sup>€</sup>                                              | 3(9)          | 2(2)          | 1(6)          | 4(4)          |
| Corticosteroids, n(%)                                              | 23(68)        | 49(59)        | 11(61)        | 61(62)        |
| Corticosteroid dose, median(IQR), mg of prednisone equivalent      | 7.5(0, 20)    | 5(0, 15)      | 10(0, 20)     | 5(0, 20)      |
| <b>Laboratory and Urine</b>                                        |               |               |               |               |
| WBC, k/uL, median (IQR)                                            | 6.2(4.4, 7.9) | 6.2(4.4, 7.1) | 5.2(4.5, 7.1) | 6.2(4.4, 7.7) |
| Absolute Neutrophil Count, k/uL, median (IQR)                      | 4.4(2.8)      | 4.1(2.4, 5.6) | 3.3(2.7, 5.1) | 4.2(2.4, 5.5) |
| Absolute Lymphocyte Count, k/uL, median (IQR)                      | 1.3(0.9, 1.6) | 1.2(0.8, 1.7) | 1.4(1.0, 1.7) | 1.2(0.8, 1.7) |
| Platelet count, k/uL, median (IQR)                                 | 254(221, 321) | 259(191, 336) | 250(178, 319) | 257(202, 336) |
| Glomerular filtration rate based on CKD-epi 2021 <=90ml/min, n (%) | 11 (25%)      | 22 (20.6%)    | 6 (30%)       | 27 (20.6%)    |
| Serum Albumin, g/dL, median (IQR)                                  | 3.7(3.3, 4.1) | 3.9(3.4, 4.2) | 3.7(3.3, 4.0) | 3.9(3.4, 4.2) |
| Low complement (C3 and/or C4), n(%)                                | <b>36(88)</b> | <b>55(57)</b> | <b>18(95)</b> | <b>73(62)</b> |

|                                          |                     |                  |                     |                  |
|------------------------------------------|---------------------|------------------|---------------------|------------------|
| *Missing 14 (9%) patients                |                     |                  |                     |                  |
| dsDNA positive, n(%)                     | 27(66)              | 49(52)           | 13(68)              | 63(54)           |
| *Missing 15 (10%) patients               |                     |                  |                     |                  |
| UPCR at index date, g/g,<br>median (IQR) | 0.29(0.24,<br>0.39) | 0.27(0.22, 0.34) | 0.28(0.24,<br>0.28) | 0.27(0.23, 0.36) |
| Urine RBC>5HPF, n(%)                     | <b>23(52)</b>       | <b>32(30)</b>    | <b>12(60)</b>       | <b>45(33)</b>    |

\*Statistically significant differences ( $p < 0.05$ ) between groups are bolded.

\*\*Medication and comorbidity data available for only 117 patients, 34 progressors and 83 non-progressors.

¥ Cyclophosphamide, Belimumab, Rituximab, Methotrexate, Leflunomide, IVIG

€ Angiotensin converting enzyme inhibitor (ACEI) /angiotensin receptor blockers (ARB)

**SUPPLEMENTAL TABLE 4:** Cox proportional hazard models for progressors vs. non-progressors and fast progressors vs. slow/non-progressors with clinically indicated kidney biopsy as the outcome\*

| <b>Outcome: Clinically Indicated Biopsy</b><br>N=134, 39 patients with outcome                |                                |                |
|-----------------------------------------------------------------------------------------------|--------------------------------|----------------|
|                                                                                               | <b>Adjusted HR*,<br/>95%CI</b> | <b>p-value</b> |
| Age at Index Date, per 1 year older                                                           | 0.96(0.93, 0.99)               | 0.03           |
| Duration of SLE at index date, per 1 year longer                                              | 0.96(0.92, 1.0)                | 0.3            |
| Low C3 and/or C4                                                                              |                                | 0.02           |
| No                                                                                            | 1 (reference)                  |                |
| Yes                                                                                           | 3.3(1.3, 8.7)                  |                |
| <b>Outcome: Clinically Indicated Biopsy within 2 years</b><br>N=134, 17 patients with outcome |                                |                |
|                                                                                               | <b>Adjusted HR*,<br/>95%CI</b> | <b>p-value</b> |
| Age at Index Date, per 1 year older                                                           | N/A                            | N/A            |
| Duration of SLE at index date, per 1 year longer                                              | 0.86(0.72, 1.0)                | 0.09           |
| Low C3 and/or C4                                                                              |                                | 0.11           |
| No                                                                                            | 1 (reference)                  |                |
| Yes                                                                                           | 5.4(0.68, 43)                  |                |
| Urine RBC >5per HPF                                                                           |                                | 0.06           |
| No                                                                                            | 1 (reference)                  |                |
| Yes                                                                                           | 2.6(0.95, 7.4)                 |                |

\* Complete case analyses were done. All models adjusted for race, sex and urine RBC>5 per HPF



**SUPPLEMENTAL TABLE 5:** Comparison of progressors with normal versus low complement; progressors with normal complement vs non-progressors\*

|                                                                         | Progressors<br>with Normal<br>complement<br>N=12 | Progressors<br>with Low<br>complement<br>N=56 | Progressors<br>with Normal<br>Complement<br>N=12 | Non-<br>Progressors<br>N=75 |
|-------------------------------------------------------------------------|--------------------------------------------------|-----------------------------------------------|--------------------------------------------------|-----------------------------|
| <b>Demographics</b>                                                     |                                                  |                                               |                                                  |                             |
| Age at index date, years,<br>median (IQR)                               | 41(29, 56)                                       | 28(21, 36)                                    | 41 (24, 56)                                      | 36 (28, 50)                 |
| Men, n(%)                                                               | 1(8)                                             | 6(11)                                         | 1(8)                                             | 7(9)                        |
| Black or African-<br>American, n(%)                                     | 7(58)                                            | 22(34)                                        | 5(42)                                            | 48(64)                      |
| Hispanic/Latino, n(%)                                                   | 5(42)                                            | 32(57)                                        | 7(58)                                            | 32(43)                      |
| SLE diagnosis to low<br>grade proteinuria onset,<br>years, median (IQR) | <b>6 (4, 13)</b>                                 | <b>1(0, 5)</b>                                | 6 (4, 13)                                        | 6 (1, 12)                   |
| <b>Comorbidities</b>                                                    |                                                  |                                               |                                                  |                             |
| History of hypertension,<br>n(%)                                        | 2(20)                                            | 9(21)                                         | 2 (20)                                           | 6 (10)                      |
| History of diabetes, n(%)                                               | <b>3(30)</b>                                     | <b>1(2)</b>                                   | <b>3 (30)</b>                                    | <b>3 (5)</b>                |
| <b>Medications</b>                                                      |                                                  |                                               |                                                  |                             |
| Hydroxychloroquine, n(%)                                                | 7(70)                                            | 27(64)                                        | 7 (70)                                           | 43 (70)                     |
| Azathioprine, n(%)                                                      | 2(20)                                            | 6(14)                                         | 2 (20)                                           | 12 (20)                     |

|                                       |              |               |               |              |
|---------------------------------------|--------------|---------------|---------------|--------------|
| Mycophenolate Mofetil,<br>n(%)        | 2(20)        | 2(5)          | <b>2 (20)</b> | <b>1 (2)</b> |
| Other<br>Immunosuppressives‡,<br>n(%) | <b>0</b>     | <b>6(14)</b>  | 0             | 4 (7)        |
| ACEI/ARB€, n(%)                       | 1(10)        | 2(5)          | 1 (10)        | 2 (3)        |
| Corticosteroids, n(%)                 | 6(60)        | 31(74)        | 6 (60)        | 34 (56)      |
| <b>Laboratory and Urine Data</b>      |              |               |               |              |
| eGFR CKD-epi 2021<br><90ml/min, n(%)  | 3(25)        | 11(20)        | 3 (25)        | 16 (21)      |
| dsDNA positive, n(%)                  | <b>4(33)</b> | <b>37(70)</b> | 4 (33)        | 35 (51)      |
| Urine RBC>5HPF, n(%)                  | 5(42)        | 27(48)        | 5(42)         | 21(28)       |

\* Statistically significant differences ( $p < 0.05$ ) between groups are bolded

‡ Cyclophosphamide, Belimumab, Rituximab, Methotrexate, Leflunomide, IVIG

€ Angiotensin converting enzyme inhibitor (ACEI) /angiotensin receptor blockers (ARB)
